# Supplementary material for: Using a Dual CRISPR/Cas9 Approach to Gain Insight into the Role of LRP1B in Glioblastoma
Source: MDPI journal article supplement (doi:10.3390/ijms241411285), 2023-07-10
Supplement: s1 [file s1]

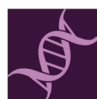

Supplementary Materials

# Using a Dual CRISPR/Cas9 Approach to Gain Insight into the Role of LRP1B in Glioblastoma

Joana Peixoto <sup>1,2, #</sup>, Catarina Príncipe <sup>1,2,3, #</sup>, Ana Pestana <sup>1,2, †</sup>, Hugo Osório <sup>1,4,5</sup>, Marta Teixeira Pinto <sup>1,4</sup>, Hugo Prazeres <sup>1,4</sup>, Paula Soares <sup>1,2,4,5</sup>, Raquel T. Lima <sup>1,2,4,5\*</sup>

## Supplementary Tables

Table S1. sgRNA target sequences used and their respective *off-* and *on-target* scores

| Target exon | Position within the gene (bp) <sup>a</sup> | Strand | sgRNA ID | sgRNA target sequence (5' → 3') | PAM sequence | Off-target score <sup>b</sup> | On-target score <sup>c</sup> |
|-------------|--------------------------------------------|--------|----------|---------------------------------|--------------|-------------------------------|------------------------------|
| 1           | 6720                                       | Minus  | sgRNA1   | GACATTGTGGTCGCCCCGGTA           | AGG          | 96.6                          | 51.9                         |
|             | 6800                                       | Plus   | sgRNA2   | CGTGGGAGCCGACCGAGGTA            | AGG          | 90.2                          | 50.3                         |
| 85          | 1 862 943                                  | Minus  | sgRNA3   | TTTGGTCCTTCATAGCGCGT            | TGG          | 94.8                          | 32.1                         |
|             | 1 862 993                                  | Minus  | sgRNA4   | TTATAATGCAGTGCCCCCCA            | TGG          | 80.5                          | 44.2                         |

<sup>a</sup> Human LRP1B RefSeqGene NG\_051023.1, NCBI Reference Sequence [32]. <sup>b</sup> Hsu et al. [37]. <sup>c</sup> Doench et al. [57]. Off- and on-target scores range from 0 to 100, with higher scores indicating lower off-target potential and higher predicted Cas9 activity at the target site, respectively.

Table S2. Potential off-target sequences within the human genome for each selected sgRNA

| sgRNA Name | Sequence              | PAM | Score | Gene                       | Locus            |
|------------|-----------------------|-----|-------|----------------------------|------------------|
| sgRNA 1    | GACATTGTGGTCGCCCCGTA  | AGG | 100.0 | LRP1B (ENSG00000168702)    | Chr2:+142888311  |
|            | TAGAGTGTGGTCGCCCCGTA  | CGG | 0.7   |                            | Chr9:-98949462   |
|            | GAAATCGTGCTCGCCCCAGTA | GGG | 0.4   | METTL23 (ENSG00000181038)  | Chr17:-74723151  |
|            | GACATTGTGGTACCAAGTA   | AGG | 0.4   |                            | Chr11:+121529897 |
|            | GACAAGGTGGCGCCCCGGT   | CGG | 0.3   | UGCG (ENSG00000148154)     | Chr9:-114659411  |
|            | GACATGGAAGTCTCCCGGTA  | TAG | 0.2   |                            | Chr2:-14296956   |
|            | GCCATTGTGGAAGCCCTGTA  | AGG | 0.2   |                            | Chr11:+121358605 |
|            | GACATTGTGATCGCCAGGAA  | GGG | 0.1   |                            | Chr5:-5572203    |
|            | GTCATTGTGTTAGCCTGGTA  | AGG | 0.1   |                            | Chr13:+44381193  |
|            | GACAATGAGGTGCGCCAGGCA | AGG | 0.1   |                            | Chr22:+28198148  |
|            | GAGATGTGGCCCGCCTGGTA  | GGG | 0.1   |                            | Chr21:+46184543  |
| sgRNA 2    | CGTGGGAGCCGACCGAGGTA  | AGG | 100.0 | LRP1B (ENSG00000168702)    | Chr2:+142888217  |
|            | GAGGGGAGCGCACCGAGGTA  | CAG | 0.9   |                            | Chr16:+2683345   |
|            | GAGGGGAGCGCACCGAGGTA  | CAG | 0.9   |                            | Chr16:+2616850   |
|            | CGAAAGAGCCGCGGAGGTA   | GAG | 0.8   |                            | Chr15:+82042456  |
|            | CCTGGGAACAGACCGAGGGA  | GAG | 0.6   |                            | Chr19:+4454107   |
|            | CGAAGGGGCCGACCGAGGTC  | AAG | 0.6   |                            | Chr9:+34376639   |
|            | CTTGGCAGCTGCCCGAGGTA  | GAG | 0.5   |                            | Chr2:+67487160   |
|            | CGGAGGAGCCGCGGAGGTC   | CAG | 0.4   |                            | Chr2:+219922477  |
|            | CGTCCGAGCCGCGGAGGTC   | GAG | 0.4   | FOXO4 (ENSG00000184481)    | ChrX:+70316526   |
|            | CTGTGGGAGCTGCCCGAGGTT | GAG | 0.4   | GNG7 (ENSG00000176533)     | Chr19:+2513099   |
|            | CGTGGGAGCCGACCGAGGTA  | TAG | 0.4   |                            | Chr7:+157252678  |
|            |                       |     |       |                            |                  |
| sgRNA 3    | TTTGGTCCTTCATAGCGCGT  | TGG | 100.0 | LRP1B (ENSG00000168702)    | Chr2:+141032088  |
|            | GATGGTCTTTTATAGCGCGT  | AAG | 0.9   |                            | Chr15:+60777206  |
|            | GTTTGTCATTCATAGCCCGT  | GAG | 0.8   |                            | Chr10:+77379183  |
|            | TTGGGCTTTCATAGCACGT   | AGG | 0.4   |                            | Chr18:+47828723  |
|            | TTTGCTCTTCATAGCACCT   | TAG | 0.2   |                            | Chr1:-144870905  |
|            | TTTGTTCTTCATAGCACAT   | TGG | 0.2   |                            | Chr3:+29951857   |
|            | TCTGGTCCTCCATAGCTCTT  | GGG | 0.2   |                            | Chr8:+22995922   |
|            | TCTGGTCCTGCATAGCTCTT  | GGG | 0.2   |                            | Chr8:-22938350   |
|            | TGTGTTCTTCATAGCGGGA   | TGG | 0.2   |                            | Chr10:+32865797  |
|            | TTTGGTCAATCACAGCGCGC  | CAG | 0.2   |                            | Chr9:+33076306   |
|            | TTTGGCCATTCTTAGCGCCT  | GAG | 0.2   |                            | Chr14:-33848061  |
|            |                       |     |       |                            |                  |
| sgRNA 4    | TTATAATGCAGTGCCCCCA   | TGG | 100.0 | LRP1B (ENSG00000168702)    | Chr2:+141032038  |
|            | TTCCCATCCAGTGCCCCCA   | CAG | 1.4   |                            | Chr20:+59999886  |
|            | TTGCCATGCTGTGCCCCCA   | AAG | 1.3   |                            | Chr10:-130874277 |
|            | CTATAATACAGTCCCCCA    | AAG | 1.3   |                            | Chr7:-13572699   |
|            | TTAGAATGCAGTGACCCCA   | AGG | 1.3   |                            | ChrY:-16857284   |
|            | TACAAAGCCGTGCCCCCA    | GAG | 1.0   |                            | Chr20:+29596954  |
|            | TTCTAATCCAGTGCTCCCA   | AGG | 0.9   |                            | Chr5:+107228315  |
|            | GGCTACTGCAGTGCCCCCA   | AGG | 0.8   |                            | Chr13:+113761336 |
|            | TTCTTCTCCAGTGCCCCCA   | TGG | 0.8   | MICB (ENSG00000204516)     | Chr6:+31474805   |
|            | TTCTTCTCCAGTGCCCCCA   | TGG | 0.8   | PERB11.1 (ENSG00000204520) | Chr6:+31379730   |
|            | TGAGAAAGCAGTGCCCTCCA  | AGG | 0.5   |                            | Chr2:+109576512  |

Only the the first 10 off-target sequences for each sgRNA are presentes, ordered based on their Score values. In these sequences, mismatches are denoted by red letters.

**Table S3. Oligonucleotides used for sgRNA cloning**

| Oligonucleotide duplex name | Oligonucleotide name | Sequence (5' → 3')               |
|-----------------------------|----------------------|----------------------------------|
| Duplex-1                    | 1-sense              | <b>CACCGACATTGTGGTCGCCCGGTA</b>  |
|                             | 1-antisense          | <b>AAACTACCGGGCGACCACAATGTC</b>  |
| Duplex-2                    | 2-sense              | <b>CACCGCGTGGGAGCCGACCGAGGTA</b> |
|                             | 2-antisense          | <b>AAACTACCTCGGTCGGCTCCACGC</b>  |
| Duplex-3                    | 3-sense              | <b>CACCGTTGGTCCTTCATAGCGCGT</b>  |
|                             | 3-antisense          | <b>AAACACGCGCTATGAAGGACCAAAC</b> |
| Duplex-4                    | 4-sense              | <b>CACCGTTATAATGCAGTGCCCCCA</b>  |
|                             | 4-antisense          | <b>AAACTGGGGGGCACTGCATTATAAC</b> |

**Table S4. Oligonucleotide primers used for genomic DNA analysis**

| Oligonucleotide name | Position within the gene (bp) <sup>a</sup> | Strand | Sequence (5' → 3')      |
|----------------------|--------------------------------------------|--------|-------------------------|
| LRP1B-01-Fw          | 6574                                       | Plus   | GCTGACTGGCTGGACTCATT    |
| LRP1B-01-Rv          | 6869                                       | Minus  | TTATCTGCAAGCATCGCCCA    |
| LRP1B-01-In          | 6774                                       | Minus  | ACCCTGGCAATCGGCAATAA    |
| LRP1B-85-Fw          | 1 862 483                                  | Plus   | AGGTGTGAAGGAGGCAACAA    |
| LRP1B-85-Rv          | 1 862 145                                  | Minus  | GCAATGGGCACAATACGGAA    |
| LRP1B-85-In          | 1 862 966                                  | Minus  | ACCTTACACACTTGTCAACCTCA |

<sup>a</sup> Human *LRP1B* RefSeqGene NG\_051023.1, NCBI Reference Sequence [32].

**Table S5.** List of differentially expressed proteins (DESPs) found in the secretomes of clones B9, E6 and H7, when compared to secretomes from mock cells.

|                        |                |        |                                                              | Abundance | Abundance        |             |
|------------------------|----------------|--------|--------------------------------------------------------------|-----------|------------------|-------------|
|                        |                |        |                                                              | Ratio:    | Ratio Adj. P-    |             |
|                        |                |        |                                                              | (clone) / | Value: (clone) / |             |
|                        |                |        |                                                              | Mock      | Mock             |             |
| Clone B9<br>vs<br>Mock | Up-regulated   | Q9UNZ2 | NSFL1 cofactor p47                                           | NSFL1C    | 100              | 1.7206E-16  |
|                        |                | Q96KG7 | Multiple epidermal growth factor-like domains protein 10     | MEGF10    | 100              | 1.7206E-16  |
|                        |                | P05231 | Interleukin-6                                                | IL6       | 100              | 1.7206E-16  |
|                        |                | P08254 | Stromelysin-1                                                | MMP3      | 11.524           | 2.6517E-05  |
|                        |                | P48307 | Tissue factor pathway inhibitor 2                            | TFPI2     | 9.668            | 0.0002      |
|                        |                | P03956 | Interstitial collagenase                                     | MMP1      | 9.409            | 0.0002      |
|                        |                | Q7Z304 | MAM domain-containing protein 2                              | MAMDC2    | 8.76             | 0.0004      |
|                        |                | P21741 | Midkine                                                      | MDK       | 7.771            | 0.0013      |
|                        |                | P17301 | Integrin alpha-2                                             | ITGA2     | 6.729            | 0.0045      |
|                        |                | P05120 | Plasminogen activator inhibitor 2                            | SERPINB2  | 6.53             | 0.0057      |
|                        |                | Q16363 | Laminin subunit alpha-4                                      | LAMA4     | 6.387            | 0.0068      |
|                        | Down-regulated | P02452 | Collagen alpha-1(I) chain                                    | COL1A1    | 0.361            | 0.0379      |
|                        |                | P58215 | Lysyl oxidase homolog 3                                      | LOXL3     | 0.359            | 0.0366      |
|                        |                | P41222 | Prostaglandin-H2 D-isomerase                                 | PTGDS     | 0.317            | 0.0152      |
|                        |                | Q13449 | Limbic system-associated membrane protein                    | LSAMP     | 0.308            | 0.0120      |
|                        |                | P21810 | Biglycan                                                     | BGN       | 0.288            | 0.0075      |
|                        |                | P08123 | Collagen alpha-2(I) chain                                    | COL1A2    | 0.286            | 0.0071      |
|                        |                | P29279 | CCN family member 2                                          | CCN2      | 0.269            | 0.0044      |
|                        |                | P05156 | Complement factor I                                          | CFI       | 0.258            | 0.0032      |
|                        |                | Q9BRK3 | Matrix remodeling-associated protein 8                       | MXRA8     | 0.254            | 0.0028      |
|                        |                | P05109 | Protein S100-A8                                              | S100A8    | 0.228            | 0.0011      |
|                        |                | Q9BQT9 | Calsyntenin-3                                                | CLSTN3    | 0.221            | 0.00081     |
|                        |                | Q9UI42 | Carboxypeptidase A4                                          | CPA4      | 0.21             | 0.00051     |
|                        |                | P06276 | Cholinesterase                                               | BCHE      | 0.185            | 0.0001      |
|                        |                | Q9BXX0 | EMILIN-2                                                     | EMILIN2   | 0.156            | 2.4687E-05  |
|                        |                | P01009 | Alpha-1-antitrypsin                                          | SERPINA1  | 0.149            | 1.5161E-05  |
|                        |                | Q14126 | Desmoglein-2                                                 | DSG2      | 0.133            | 4.1205E-06  |
|                        |                | Q8IX30 | Signal peptide. CUB and EGF-like domain-containing protein 3 | SCUBE3    | 0.01             | 1.7206E-16  |
| Clone E6<br>vs<br>Mock | Up-regulated   | Q96KG7 | Multiple epidermal growth factor-like domains protein 10     | MEGF10    | 100              | 1.7171E-16  |
|                        |                | P05231 | Interleukin-6                                                | IL6       | 100              | 1.7171E-16  |
|                        |                | Q9C0C2 | 182 kDa tankyrase-1-binding protein                          | TNKS1BP1  | 100              | 1.71716E-16 |
|                        |                | Q9UNZ2 | NSFL1 cofactor p47                                           | NSFL1C    | 100              | 1.71716E-16 |

Table S5. (cont.)

|                                     |                                   |                |                                                          |          | Abundance<br>Ratio:<br>(clone) /<br>Mock | Abundance<br>Ratio Adj. P-<br>Value: (clone) /<br>Mock |
|-------------------------------------|-----------------------------------|----------------|----------------------------------------------------------|----------|------------------------------------------|--------------------------------------------------------|
| Accession                           | Description                       | Gene<br>Symbol |                                                          |          |                                          |                                                        |
| <b>Clone<br/>E6 vs<br/>Mock</b>     | <b>Down -<br/>regu-<br/>lated</b> | P21589         | 5'-nucleotidase                                          | NT5E     | 0.173                                    | 0.0400                                                 |
|                                     |                                   | Q13449         | Limbic system-associated membrane protein                | LSAMP    | 0.139                                    | 0.013337294                                            |
|                                     |                                   | Q9BXX0         | EMILIN-2                                                 | EMILIN2  | 0.1                                      | 0.002047735                                            |
| <b>Clone<br/>H7<br/>vs<br/>Mock</b> | <b>Up-<br/>regu-<br/>lated</b>    | P05231         | Interleukin-6                                            | IL6      | 100                                      | 1.5956E-16                                             |
|                                     |                                   | Q9UNZ2         | NSFL1 cofactor p47                                       | NSFL1C   | 100                                      | 1.5956E-16                                             |
|                                     |                                   | Q96KG7         | Multiple epidermal growth factor-like domains protein 10 | MEGF10   | 100                                      | 1.5956E-16                                             |
|                                     |                                   | Q9C0C2         | 182 kDa tankyrase-1-binding protein                      | TNKS1BP1 | 100                                      | 1.5956E-16                                             |
|                                     |                                   | P36222         | Chitinase-3-like protein 1                               | CHI3L1   | 17.201                                   | 1.25923E-07                                            |
|                                     |                                   | Q15782         | Chitinase-3-like protein 2                               | CHI3L2   | 10.62                                    | 3.37175E-05                                            |
|                                     |                                   | Q7Z304         | MAM domain-containing protein 2                          | MAMDC2   | 9.764                                    | 7.90558E-05                                            |
|                                     |                                   | P00751         | Complement factor B                                      | CFB      | 9.3                                      | 0.0001                                                 |
|                                     |                                   | P43235         | Cathepsin K                                              | CTSK     | 7.39                                     | 0.0011                                                 |
|                                     |                                   | P06702         | Protein S100-A9                                          | S100A9   | 7.346                                    | 0.0011                                                 |
|                                     |                                   | P05156         | Complement factor I                                      | CFI      | 7.108                                    | 0.0015                                                 |
|                                     |                                   | Q9BU40         | Chordin-like protein 1                                   | CHRD1    | 6.741                                    | 0.0024                                                 |
|                                     |                                   | P49908         | Selenoprotein P                                          | SELENOP  | 6.686                                    | 0.0025                                                 |
|                                     |                                   | P05109         | Protein S100-A8                                          | S100A8   | 6.415                                    | 0.0036                                                 |
|                                     |                                   | Q9UKU9         | Angiopoietin-related protein 2                           | ANGPTL2  | 5.138                                    | 0.0186                                                 |
|                                     |                                   | Q15274         | Nicotinate-nucleotide pyrophosphorylase [carboxylating]  | QPRT     | 4.797                                    | 0.0297                                                 |
|                                     |                                   | Q7Z7M9         | Polypeptide N-acetylgalactosaminyltransferase 5          | GALNT5   | 4.771                                    | 0.0307                                                 |
|                                     |                                   | Q16363         | Laminin subunit alpha-4                                  | LAMA4    | 4.705                                    | 0.0338                                                 |
|                                     | <b>Down-<br/>regu-<br/>lated</b>  | P55290         | Cadherin-13                                              | CDH13    | 0.305                                    | 0.0365                                                 |
|                                     |                                   | O95388         | CCN family member 4                                      | CCN4     | 0.294                                    | 0.0287                                                 |
|                                     |                                   | P29279         | CCN family member 2                                      | CCN2     | 0.273                                    | 0.0173                                                 |
|                                     |                                   | Q99715         | Collagen alpha-1(XII) chain                              | COL12A1  | 0.253                                    | 0.0101                                                 |
|                                     |                                   | O15240         | Neurosecretory protein VGF                               | VEGF     | 0.194                                    | 0.0012                                                 |
|                                     |                                   | Q96AM1         | Mas-related G-protein coupled receptor member F          | MRGPRF   | 0.19                                     | 0.0010                                                 |
|                                     |                                   | P15692         | Vascular endothelial growth factor A                     | VEGFA    | 0.167                                    | 0.0003                                                 |
|                                     |                                   | Q13449         | Limbic system-associated membrane protein                | LSAMP    | 0.144                                    | 7.52018E-05                                            |
|                                     |                                   | Q9BXX0         | EMILIN-2                                                 | EMILIN2  | 0.113                                    | 5.36226E-06                                            |
|                                     |                                   | P21810         | Biglycan                                                 | BGN      | 0.1                                      | 1.29275E-06                                            |
|                                     |                                   | Q8N6T3         | ADP-ribosylation factor GTPase-activating protein 1      | ARFGAP1  | 0.01                                     | 1.5956E-16                                             |
|                                     |                                   | Q9NT68         | Teneurin-2                                               | TENM2    | 0.01                                     | 1.5956E-16                                             |
|                                     |                                   | O75635         | Serpin B7                                                | SERPINB7 | 0.01                                     | 1.5956E-16                                             |
|                                     |                                   | Q86UN3         | Reticulon-4 receptor-like 2                              | RTN4RL2  | 0.01                                     | 1.5956E-16                                             |

## Supplementary Figures

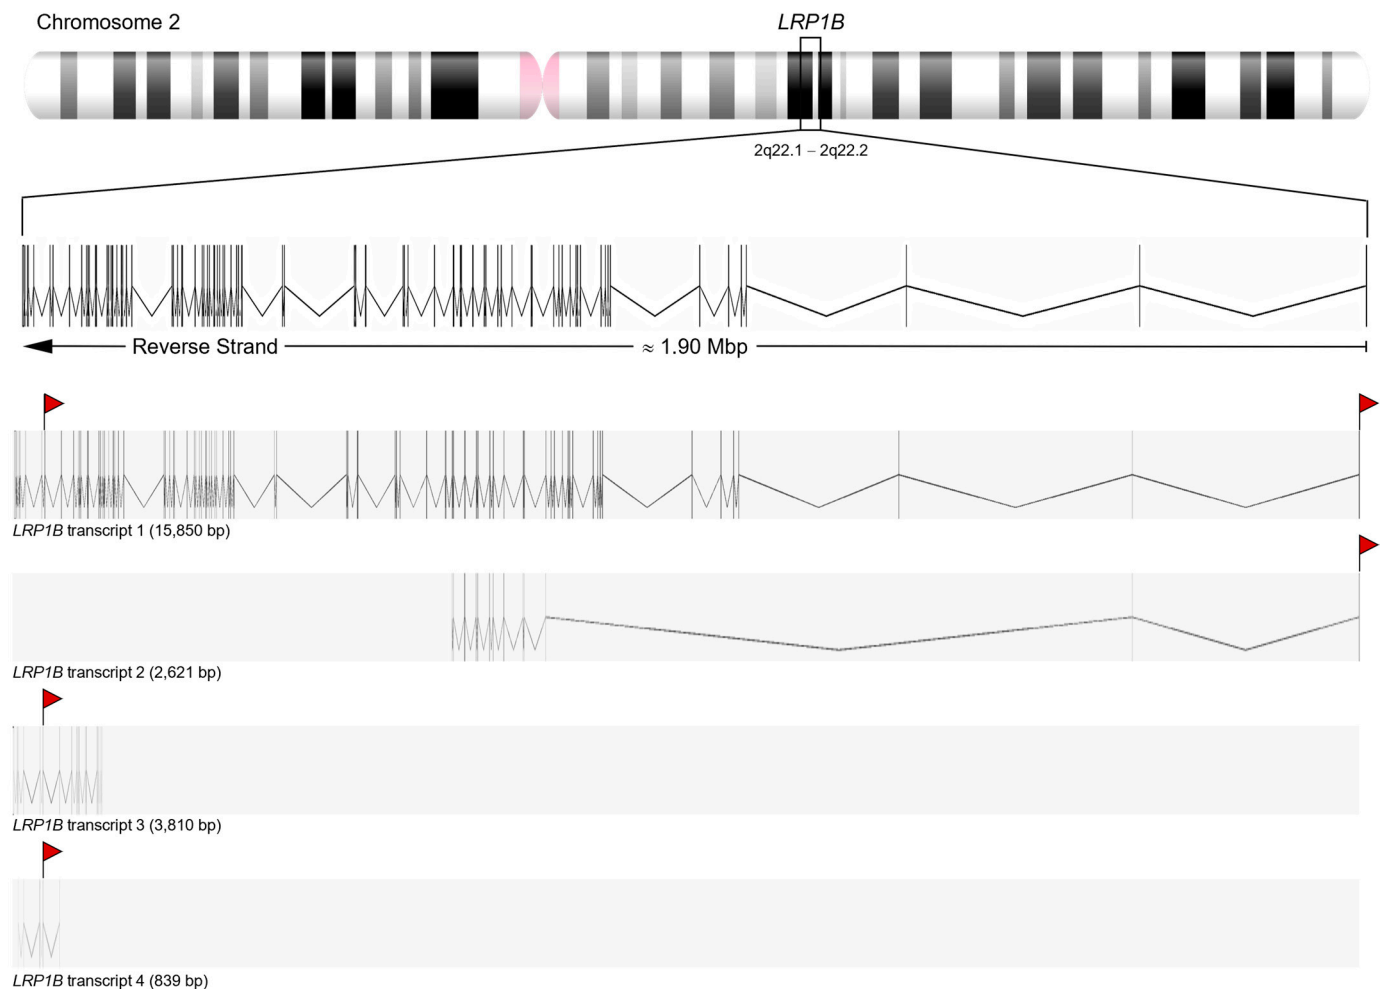

**Figure S1. Schematic representation of *LRP1B* gene and targeted regions.** Chromosomal location of the *LRP1B* locus. The chromosome ideogram was obtained from the NCBI online tool [31]. Human *LRP1B* is located on the long arm of chromosome 2 at position 2q22.1-2q22.2. It spans from 140.231.423 to 142.131.016 bp, according to the human genome assembly GRCh38.p13 from the Genome Reference Consortium [78] being approximately 1.90 megabase pairs (Mbp) long and composed of 91 exons that comprise 13.80 kilobase pairs (kbp) of coding sequence (CDS). Schematic representation of *LRP1B* gene structure depicting the exon-intron structure of *LRP1B*. The human *LRP1B* (ID: ENSG00000168702) has four putative protein-coding transcripts [33]: (i) full-length *LRP1B* transcript (***LRP1B* transcript 1**; ID: ENST00000389484.8), which includes all 91 annotated exons that together encode a 4599-amino acid membrane-bound protein (LRP1B) and (ii) three other predicted alternatively spliced *LRP1B* transcripts (***LRP1B* transcripts 2, 3 and 4**) that have their CDS incomplete on the 3' end, 5' end, or both ends. Specifically, *LRP1B* transcript 2 contains 14 exons (1,2,18-29; ID: ENST00000434794.1), which encode a putative 781-amino acid soluble LRP1B isoform. *LRP1B* transcripts 3 and 4 encode two putative membrane-bound LRP1B isoforms of 789 and 280 amino acids, respectively. *LRP1B* transcript 3 contains 17 exons (74-89, 91; ID: ENST0000043-7977.5), whereas *LRP1B* transcript 4 contains 7 exons (84-89, including an extra 114 bp exon between exons 86 and 87; ID: ENST00000442974.1). The gene and transcripts schemes were obtained from Ensembl release version 100 [33,35]. The most upstream exons shared by the majority of the *LRP1B* predicted transcripts are signaled with red flags.

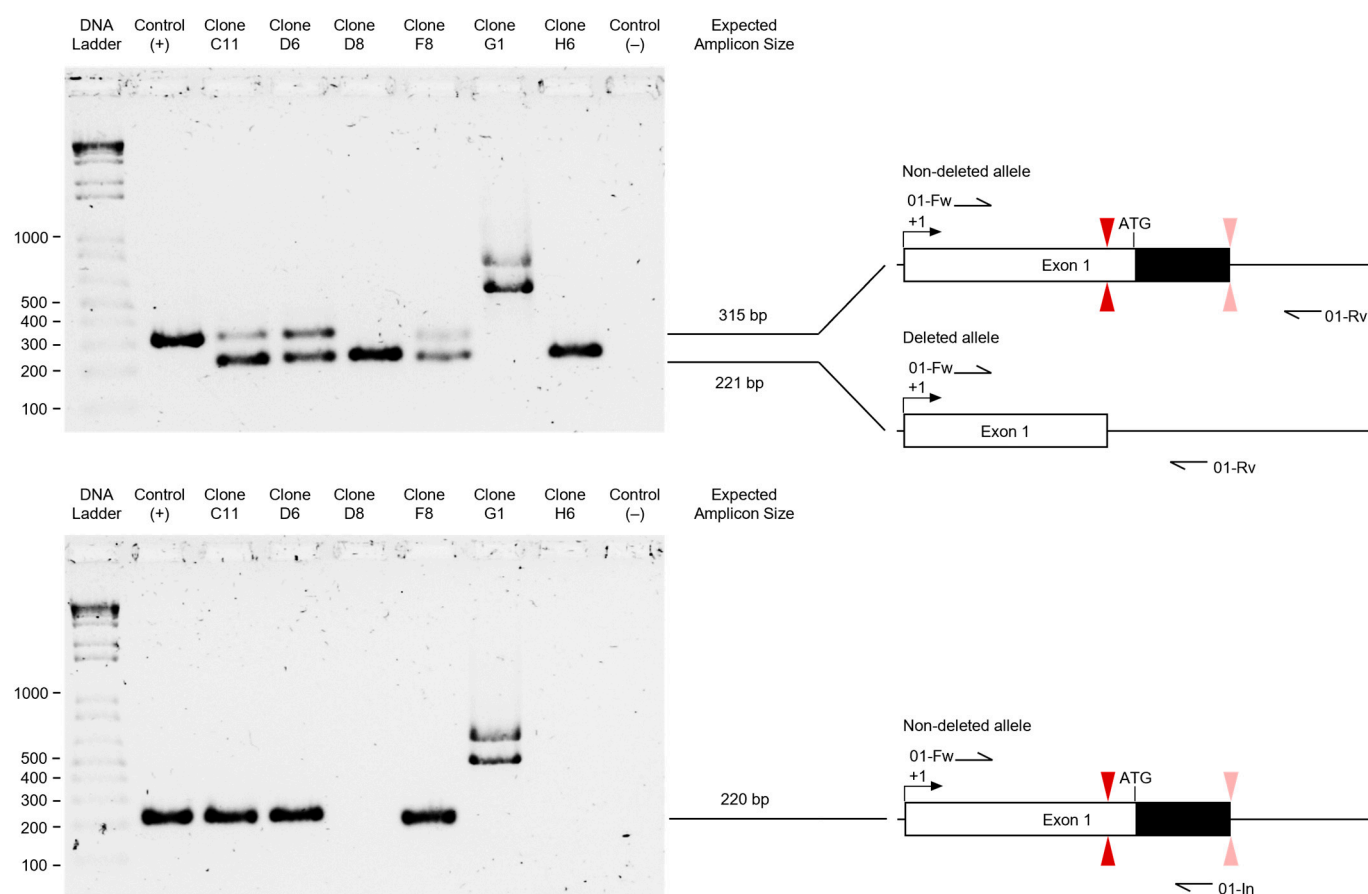

**Figure S2. Representative images of PCR analysis of transfected selected clones.** Exon 1 analysis for some clones derived from U87 cells transfected with paired PX459-sgRNA1 and -2 vectors. *Upper panel.* the CRISPR/Cas9-targeted exon 1 was amplified from genomic DNA using the primers forward (01-Fw) and reverse (01-Rv). Expected sizes of the PCR amplicons for *LRP1B* non-deleted and deleted alleles are 315 bp and 221 bp, respectively. *Lower panel.* the CRISPR/Cas9-targeted exon 1 was amplified from genomic DNA using the primers forward (01-Fw) and reverse internal (01-In). The expected size of the PCR amplicon for the *LRP1B* non-deleted allele is 220 bp. Control (+), positive control using genomic DNA from the parental (wild-type) U87 cells and the appropriate primer set for each PCR; Control (-), negative control for each primer set (no DNA template); DNA Ladder, 1 kbp DNA ladder. Schematic representation of the *LRP1B* non-deleted and deleted alleles is depicted on the right side of the panels. Labeled black arrows indicate the positions and orientations of PCR primers. The arrowheads indicate the CRISPR/Cas9 target sites within *LRP1B* exon 1.

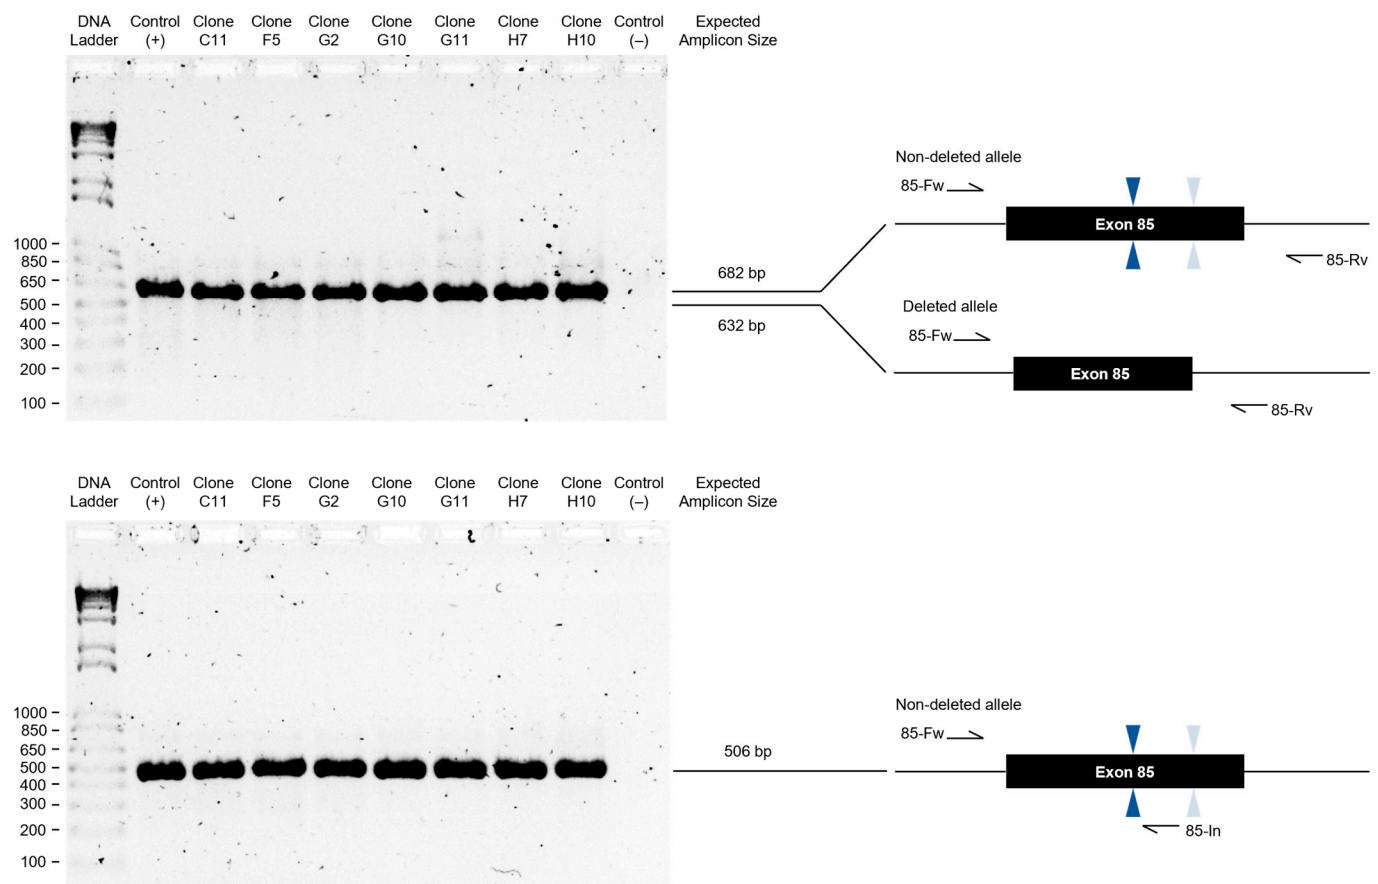

**Figure S3. Representative images of PCR analysis of exon 85 for some clones derived from U87 cells transfected clones with A) PX459-sgRNA3 and PX459-sgRNA4 vectors and B) all PX459-sgRNA vectors (1. -2. -3 and -4 ).** Upper panels, the CRISPR/Cas9-targeted exon 85 was amplified from genomic DNA using the primers forward (85-Fw) and reverse (85-Rv). The expected sizes of the PCR amplicons for *LRP1B* non-deleted and deleted alleles are 682 bp and 632 bp, respectively. Lower panel, the CRISPR/Cas9-targeted exon 85 was amplified from genomic DNA using the primers forward (85-Fw) and reverse internal (01-In). The expected size of the PCR amplicon for the *LRP1B* non-deleted allele is 506 bp. Control (+), positive control using genomic DNA from the parental U87 human glioblastoma cell line and the appropriate primer set for each PCR; Control (-), negative control for each primer set (no DNA template); DNA Ladder, 1 kbp DNA ladder. Schematic representation of the *LRP1B* non-deleted and deleted alleles is depicted on the right side of the panels. Labeled black arrows indicate the positions and orientations of PCR primers. The arrowheads indicate the CRISPR/Cas9 target sites within *LRP1B* exon 85.

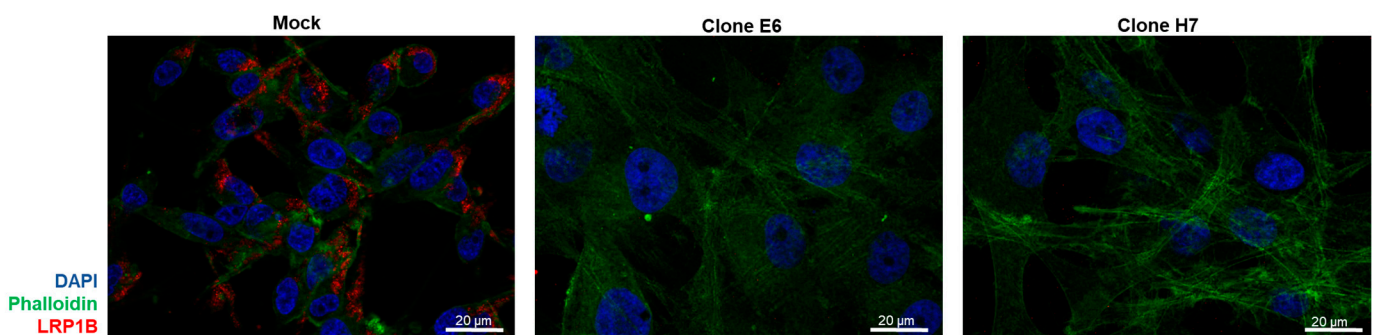

**Figure S4. Decreased LRP1B expression in LRP1B-edited clones E6 and H7, compared to mock cells, evaluated by immunofluorescence.** Images are representative of 2 independent experiments.



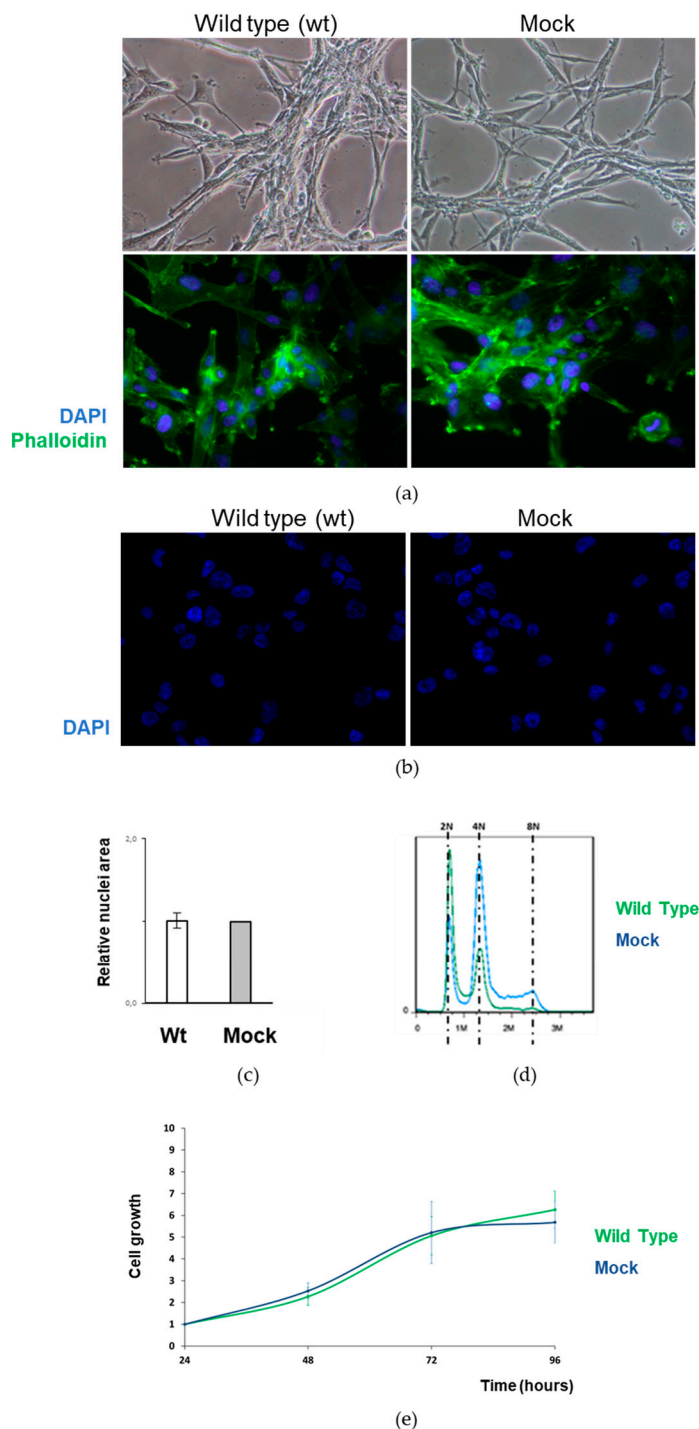

**Figure S5. U87 wild type (wt; non-transfected) and mock cells.** (a) Cell morphology in adherent cells in culture evaluated by phase contrast microscopy and fluorescence microscopy (b) Representative images of DAPI-stained nuclei from cells after cytopsin. Cell nuclei area (evaluated with ImageJ software with NII plugin) was analyzed in relation to mock cells nuclei area. Results are the mean  $\pm$  SEM of 3 independent experiments. (d) Representative cell cycle profile evaluated by flow cytometry following propidium iodide staining. Images are representative of, at least, 3 independent experiments. (e) Cell growth analysis, with Presto blue viability assay following 24 h, 48, 72, and 96 h in culture. Results, expressed in relation to the 24 h, are the mean  $\pm$  SEM of at six independent experiments.
